# Supplementary material
Source: PubMed Central journal article supplement (PMC7089022)
Supplement: pt9b00035_si_001.pdf [file pt9b00035_si_001.pdf]

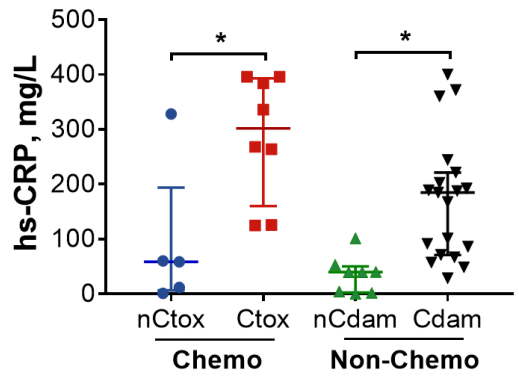

**Figure S1.** Two-way ANOVA of hs-CRP showed significant difference between the nCx and Ctox, also between the nCdam and Cdam.

|     |            |            |            |                   |     |
|-----|------------|------------|------------|-------------------|-----|
| 1   | MKLLTGLVFC | SLVLGVSSRS | FFSFLGEAFD | GARDMWRAYS        | 40  |
| 41  | DMREANYIGS | DKYFHARGNY | DAAKRGPGGA | WAAEVISDAR        | 80  |
| 81  | ENIQRFFGHG | AEDSLADQAA | NEWGRSGKDP | <u>NHFRPAGLPE</u> | 120 |
| 121 | <u>KY</u>  |            |            |                   | 122 |

**Figure S2.** Known enzyme cleavage sites in SAA1. Symbols indicate reported cleavage sites produced by CTSB (red triangle), cathepsin L (blue triangle), MMP-1 (black triangle), MMP-3 (open triangle), and merpin A alpha (black circle) and beta (open circle) subunits. The SAA-1525 peptide is indicated by red underlined text.

**Table S2.** Two-way ANOVA analysis of SAA-1525 between groups.

| <b>Table Analyzed SAA-1525</b>           | <b>2-way Anova</b>      |
|------------------------------------------|-------------------------|
| <b>Sidak's multiple comparisons test</b> | <b>Adjusted P Value</b> |
| Ctox:Chemo vs. Cdam:Non-chemo            | 0.0004                  |
| Ctox:Chemo vs. nCtox:Chemo               | 0.0011                  |
| Ctox:Chemo vs. nCdam:Non-chemo           | 0.0002                  |
| Cdam:Non-chemo vs. nCtox:Chemo           | 0.9165                  |
| Cdam:Non-chemo vs. nCdam:Non-chemo       | 0.8242                  |
| nCtox:Chemo vs. nCdam:Non-chemo          | >0.9999                 |

| Potential biomarkers | Correlation (Spearman r) |           |          |       |
|----------------------|--------------------------|-----------|----------|-------|
|                      | TnI                      | NT-proBNP | CK       | CK-MB |
| <b>Chemo</b>         |                          |           |          |       |
| SAA-1525             | 0.869(***)               | 0.577(*)  | 0.518    | 0.509 |
| n                    | 13                       | 13        | 11       | 11    |
| CTSB                 | 0.698(*)                 | 0.773(**) | 0.709(*) | 0.418 |
| n                    | 11                       | 11        | 10       | 10    |
| <b>Non-Chemo</b>     |                          |           |          |       |
| SAA-1525             | 0.461(*)                 | 0.297     | 0.134    | 0.248 |
| n                    | 27                       | 27        | 24       | 26    |
| CTSB                 | 0.376                    | 0.618(**) | 0.012    | 0.393 |
| n                    | 25                       | 25        | 22       | 24    |

**Table S3.** Correlation between laboratory indicators and biomarker candidates.

\* $p < 0.05$ ; \*\* $p < 0.01$ ; \*\*\* $p < 0.001$ .
